# Supplementary material for: Pandemic Communication: Information Seeking, Evaluation, and Self-Protective Behaviors in Vietnam and the Republic of Korea
Source: Frontiers journal article supplement (doi:10.3389/fcomm.2021.731979), 2021-08-03
Supplement: Data_Sheet_1.docx [file Data_Sheet_1.docx]

Appendix A: Summary of Questions Asked to Participants

1. Age
2. Gender
3. Highest education attained
4. Language most spoken/ understood
5. Income
6. Number of people in household
7. Is it easy to get information related to COVID-19 in your country? (yes/no)
   1. If no, what are the difficulties you face
   2. What channels do you get information on COVID-19 from?
   3. What kind of materials do you find most useful?
   4. What information related to COVID-19 has helped you to most to protect yourself against the disease?
   5. Is there any information about COVID-19 that y ou would like to have, but is difficult to receive in your country?
8. Have you seen any misinformation/ rumors on COVID-19? (yes/no)
   1. If yes, what was the information about?
   2. If yes, what channel did it come from?
   3. If yes, How did you know it was not true?
9. What would you suggest the health authority in your country do to better inform the public about COVID-19
10. Are you worried about COVID-19? (5 - point scale from not at all to very)
    1. Why?
11. Do you think you are at risk of being infected by COVID-19?
    1. Why?
12. How worried about the future are you as a result of COVID-19? (5-point scale from not at all to very)
    1. Why?
13. Any other comments?
